# Supplementary material for: InterCellar enables interactive analysis and exploration of cell−cell communication in single-cell transcriptomic data
Source: PubMed Central journal article supplement (PMC8752611; doi:10.1038/s42003-021-02986-2), 2022-01-11
Supplement: 42003_2021_2986_MOESM2_ESM.pdf [file 42003_2021_2986_MOESM2_ESM.pdf]

# InterCellar enables interactive analysis and exploration of cell-cell communication in single-cell transcriptomic data

Marta Interlandi<sup>1,2\*</sup>, Kornelius Kerl<sup>2</sup> and Martin Dugas<sup>1,3</sup>

<sup>1</sup> Institute of Medical Informatics, University of Münster, Münster, Germany

<sup>2</sup> Department of Pediatric Hematology and Oncology, University Children's Hospital Münster, Münster, Germany

<sup>3</sup> Institute of Medical Informatics, Heidelberg University Hospital, Heidelberg, Germany

\*Correspondence: [marta.interlandi@uni-muenster.de](mailto:marta.interlandi@uni-muenster.de)

## Supplementary Information

### Supplementary Note 1: Input data from tools supported by InterCellar

In order to increase the general usability of InterCellar, four published methods allowing the prediction of cell-cell communication from scRNA-seq data are automatically supported as input tools to InterCellar<sup>1-4</sup>. This allows straightforward interoperability between InterCellar and the chosen tool, with no further data preparation required. Here we describe in detail the

characteristics of the cell-cell interactions dataset (CCI data) that InterCellar expects as input, depending on the supported tool chosen.

## CellChat

Users running the CellChat<sup>1</sup> R package to obtain predicted cell-cell interactions should save the dataframe generated by the CellChat function `subsetCommunication` as a .csv file (or .xlsx/.tsv). This can be accomplished by following the steps suggested in the CellChat tutorial

([https://htmlpreview.github.io/?https://github.com/sqjin/CellChat/blob/master/tutorial/CellChat\\_vignette.html](https://htmlpreview.github.io/?https://github.com/sqjin/CellChat/blob/master/tutorial/CellChat_vignette.html)). We recommend the R function `write.csv` (with parameter `quote = FALSE`) to save the dataframe into a .csv file that can be loaded by InterCellar. A snippet of the dataframe generated on the melanoma data can be found as an example in Supplementary Table 2. InterCellar automatically parses the dataframe and generates preprocessed CCI data by restructuring the information as follow:

- `Int_pair`: from column "interaction\_name\_2", substituting "-" with "&";
- `geneA`, `geneB`: retrieved from "interaction\_name\_2", split by "-";
- `typeA` = L (ligand), `typeB` = R (receptor);
- `clustA` = "source", `clustB` = "target";
- `Score` = "prob";
- `P_value` = "pval";
- `Int.type` = autocrine (if `clustA=clustB`) or paracrine (otherwise);
- `Pathway_cellchat` = "pathway\_name";
- `Annotation_cellchat` = "annotation";
- `Evidence_cellchat` = "evidence".

## CellPhoneDB v2

Users adopting CellPhoneDB v2<sup>2</sup> (CPDB) as an inference method have the option of running a statistical analysis that computes p-values of significance for each interaction. CPDB tutorials can be found at <https://github.com/Teichlab/cellphonedb>. When the statistical analysis has been run, the user will find four output .txt files corresponding to "deconvoluted", "means", "pvalues", and "significant\_means". In this case, InterCellar relies on the "significant\_means" and "pvalues" files, otherwise, on the file "means". Thus, as input to InterCellar, the user must specify the output folder generated by CPDB. An example of the "significant\_means" file can be seen in Supplementary Table 3. In order to build the

preprocessed CCI data, InterCellar relies on CPDB specific annotation that is either included in the supplied files (e.g., “significant\_means”) or retrieved from CPDB documentation, namely the `gene_input` and `complex_input` tables (<https://www.cellphonedb.org/documentation>). Moreover, as CPDB considers also multi sub-units complexes, InterCellar will retain this information and integrate it with simple interaction-pairs. Information is mapped as follows:

- `Int_pair`: `gene_a` & `gene_b`, or name of complex;
- `geneA` = `gene_a` or list of gene symbols separated by “,” for complexes, retrieved from `complex_input` table;
- `geneB` = `gene_b` or list of gene symbols separated by “,” for complexes, retrieved from `complex_input` table;
- `typeA`, `typeB`: depending on “`receptor_a`” and “`receptor_b`” columns;
- `clustA`, `clustB`: from the `col.names` of the table, split by “|”;
- `Score` = “`mean_value`”;
- `P-value`: retrieved from the “`pvalues`” file, when present;
- `Annotation_strategy` = “`annotation_strategy`”;
- `Int.type` = `autocrine` (if `clustA=clustB`) or `paracrine` (otherwise);

Due to the fact that CPDB does not order int-pairs as L-R pairs, InterCellar will reorder all pairs (and respective cluster-pairs) to comply with an L-R arrangement. Moreover, we manually updated the annotation to L or R of certain genes that were incorrectly annotated by CPDB ([https://github.com/martaint/InterCellar-reproducibility/blob/main/preprocessing/checkLL\\_RR.R](https://github.com/martaint/InterCellar-reproducibility/blob/main/preprocessing/checkLL_RR.R)). Importantly, int-pairs collected by CPDB are composed of L-R, L-L, and R-R pairs, thus providing an explanation as to why the labeling of undirected interactions by InterCellar (L-L and R-R).

## ICELLNET

ICELLNET<sup>4</sup> requires the user to select (1) a cell cluster of interest (i.e., central cell) and (2) a direction of communication (“in” for incoming, “out” for outgoing), from which to compute the cell-cell interactions. This information must be provided by the user in InterCellar’s upload section, along with a dataframe generated by ICELLNET’s function `icellnet.score` (see the tutorial at [https://github.com/soumelis-lab/ICELLNET/blob/master/Exemple2\\_scRNAseq.md](https://github.com/soumelis-lab/ICELLNET/blob/master/Exemple2_scRNAseq.md)). This dataframe should be saved as a `.csv` file with the R function `write.csv` (with parameter `row.names = TRUE`). An example of ICELLNET’s dataframe is shown in Supplementary Table 4. In this case, we consider as central cell malignant cells from the melanoma dataset,

and outgoing communication towards all other clusters. InterCellar parses the dataframe and generates preprocessed CCI data as follow:

If direction = "out":

- Int\_pair: row.names of the dataframe, substituting " / " with "&;
- geneA, geneB: retrieved from row.names, split by " / ";
- typeA = L (ligand), typeB = R (receptor);
- clustA = name of the central cell, clustB = col.names taken from ICELLNET dataframe;
- Score = numerical entries of the dataframe;
- Int.type = autocrine (if clustA=clustB) or paracrine (otherwise).

When direction = "in", clustA would be taken from col.names, while clustB = central cell.

## SingleCellSignalR

Instructions on how to run SingleCellSignalR<sup>3</sup> (SCSR) to obtain predicted CCI data can be found [at https://bioconductor.org/packages/release/bioc/vignettes/SingleCellSignalR/inst/doc/UsersGuide.html](https://bioconductor.org/packages/release/bioc/vignettes/SingleCellSignalR/inst/doc/UsersGuide.html). InterCellar expects as input the folder called "cell-signaling" generated by running the SCSR function cell\_signaling. This folder contains multiple .txt files for each cluster-pair considered. A snippet of an example file can be found in Supplementary Table 5. InterCellar parses each of these files and combines the information into a single preprocessed CCI data, as follow:

- Int\_pair: from elements in first and second columns of SCSR files, separated by "&;
- geneA: elements from first column, geneB: elements from second column;
- typeA = L (ligand), typeB = R (receptor);
- clustA = col.name of first column; clustB = col.name of second column;
- Score = "LRscore";
- Int.type = autocrine (if clustA=clustB) or paracrine (otherwise). As SCSR defines as "autocrine|paracrine" interactions that are paracrine but are also found as autocrine, we rename these "paracrine" to be consistent with other tools;
- scSignalR\_specific: TRUE for interactions labeled as "specific" by SCSR, when both ligand and receptor are significantly enriched in their respective clusters.

# Supplementary Note 2: Filtering options provided in the gene-verse

InterCellar's gene-verse provides the user with filtering options that are specific to the input tool chosen. As a reminder, these filters have a global impact, subsetting the input data for further analyses. Here we present in detail which filters are provided, depending on the input tool.

## CellChat

CellChat-specific filters regard the pathway annotation of int-pairs (column "pathway\_cellchat") and the source of annotation (column "annotation\_cellchat") that are performed by CellChat. In particular, the user has the option to exclude unwanted pathways from a drop-down menu and deselect unwanted annotations among "secreted signaling", "ECM-receptor", and "cell-cell contact".

## CellPhoneDB v2

Users that chose to run CPDB to obtain predicted CCI data will have the option to refine int-pairs by excluding annotation sources used by CPDB to collect int-pairs, which are available in column "annotation\_strategy". These include multiple sources such as, for example, "curated", "IMEx", "IntAct", "I2D", etc.

## ICELLNET

Due to the fact that no additional annotation is provided by ICELLNET, no filtering options are available here.

## SingleCellSignalR

As SCSR provides information regarding the specificity of an int-pair (see Supplementary Note 1), the user has the option to restrict the analysis to only specific interactions.

## Supplementary Note 3: Comparison with CellChat

Many tools that perform cell-cell communication inference are available to the scientific community<sup>5</sup>. Comparing differences and similarities between InterCellar and existing applications might help the reader place InterCellar in this landscape. Among the tools that provide functionalities for downstream analysis, we chose CellChat, whose workflow appears to have many commonalities with InterCellar. Even though a Shiny implementation of CellChat exists, we decided to consider the R package which, although requiring programming skills, provides visualization and analysis options comparable to InterCellar. The CellChat Shiny app (<https://github.com/sqjin/CellChatShiny>), instead, only provides a limited set of analysis options, restricted to an initial choice of signaling pathways of interest. To run CellChat, we followed the tutorial available at <https://htmlpreview.github.io/?https://github.com/sqjin/CellChat/blob/master/tutorial/CellChat-vignette.html>.

The main focus of our comparison are visualization options provided by each tool and, specifically, how these can improve the interpretation of complex results in cell-cell communication analysis.

As a first overview of the communication patterns, the number of interactions occurring between each pair of clusters is generally considered. In InterCellar, this can be achieved in the cluster-verse (Figure 2a): when comparing the network visualization generated by InterCellar with the circle plot output of CellChat (Supplementary Figure 6a), we can appreciate how, even though an analogous output is produced, InterCellar's added value is an interactive network that can be dynamically remodeled by the user with a simple drag-and-drop. Moreover, clicking on a cell cluster will highlight all the connected edges, facilitating the inspection of large networks (these features are visible in the video tutorial at <https://youtu.be/X5gUqzps4E4>). Finally, both InterCellar and CellChat provide the option to show either the total or the weighted number of interactions.

A second step in the analysis could focus on the occurrence of int-pairs of interest, shown typically in a dot (or bubble) plot. Thus, we compare here InterCellar's dot plot available in the gene-verse (Figure 2b), with CellChat's bubble plot (Supplementary Figure 6b), both generated by considering all int-pairs annotated by CellChat as belonging to the "TGFb" signaling pathway. InterCellar and CellChat perform comparably well and offer customization options to the user (e.g., choice of color scheme, selection of cell clusters).

Lastly, we investigate visualization options based on annotated pathways, thus comparing InterCellar's sunburst plot (available in the function-verse, Figure 2c) with the closest kind of

visualization available in CellChat (Supplementary Figure 6c). InterCellar's sunburst plot is generated by selecting the functional term "tgf-beta signaling pathway" (annotated from KEGG and Panther) and, upon closer inspection of the enriched int-pairs, includes CellChat pathways corresponding to "TGFb", "BMP", "GDF" and "ACTIVIN". With regards to interpretation, the sunburst plot offers the advantage of condensing many sources of information in one place. Thus, cluster-pairs enriched by the selected functional term are visible and organized in such a way as to convey information regarding cluster importance. Detailed information on the (total/weighted) number of interactions as well as int-pairs occurring in each cluster-pair are available upon mouse hovering on the sunburst sections. As for the CellChat chord plot, even though the overall contribution of each cell cluster is clearly visible, the user must consider a second complementary visualization to discern enriched int-pairs (Supplementary Figure 6d). Moreover, the lack of a dynamic output for the CellChat chord plots can hinder an effective interpretation of the results in overcrowded plots.

In the end, we extend our comparative analysis on the concept of functional similarity, which is considered by both InterCellar and CellChat, albeit from two different points of view. Specifically, InterCellar calculates functional similarity among int-pairs, in contrast to the strategy adopted by CellChat where groups of pathways are defined to be functionally similar. Considering two different "similarity objects", thus leads to parallel and rather complementary analyses. This can be specifically appreciated by comparing InterCellar's UMAP of int-pairs clustered by functional similarity (Figure 3a), and CellChat's embedding of pathways clustered by functional similarity (Supplementary Figure 7). While InterCellar defines modules of int-pairs as groups of int-pairs that share a similar functional profile (Supplementary Figure 2), CellChat groups functional pathways by a shared pattern of sender and receiver clusters.

## Supplementary Figures



## Upload cell-cell interactions

### Analysis setup

Please select an existing local folder where InterCellar will save all results of your analysis.

Select folder  
//marta\_home/00\_out folder

From supported tools    From custom analysis

**CCI data #1**

CCI data ID:

Output folder tag:

Select tool:

InterCellar expects a dataframe consisting of inferred cell-cell communications at the level of ligand-receptor interactions. This can be obtained by running CellChat's function `subsetCommunication` (with `param.slot.name = 'net'`). We recommend saving this dataframe as a .csv file (quote = FALSE), but .tsv and .xlsx files are also supported.

Choose Input File (.csv/.tsv/.xlsx)

Browse...

Upload complete

**GO!**

CCI data #2 +

CCI data #3 +

**Required columns**

- int\_pair**: Interaction pair representing the names of two components that participate in the interaction (e.g. `compA_compB`). Valid separators: `'_'`, `'&'`, `'.'`
- clustA/clustB**: Cluster name or number where the expression of `compA/compB` is tested.
- typeA/typeB**: molecular type of `compA/compB`, either L (ligand) or R (receptor).
- value**: A numeric value representing a score for the interaction (e.g. average expression of `compA_compB` over `clustA` and `clustB`).

Additional columns +

**Example input table**

Show  entries    Search:

|   | int_pair                | geneA  | geneB        | typeA | typeB | clustA |
|---|-------------------------|--------|--------------|-------|-------|--------|
| 1 | ADIPOQ_CD200R1          | ADIPOQ | CD200R1      | L     | R     | B_cell |
| 2 | ANGPT2_TEK              | ANGPT2 | TEK          | L     | R     | T_cell |
| 3 | TGFB1_TGFBeta receptor1 | TGFB1  | TGFB1,TGFBR2 | L     | R     | B_cell |
| 4 | PLXNB2_SEMA4D           | PLXNB2 | SEMA4D       | R     | R     | Endo   |
| 5 | WNT5A_FZD2              | WNT5A  | FZD2         | L     | R     | Macro  |

Showing 1 to 5 of 5 entries    Previous  Next

**Custom CCI data #1**

CCI data ID:

Output folder tag:

Int\_pair separator:  \_  &  .

Choose Input File (.csv/.tsv/.xlsx)

Browse...

**GO!**

Custom CCI data #2 +

Custom CCI data #3 +

**Supplementary Figure 1. Screenshot of InterCellar’s data upload module.** The top panel (Analysis setup) allows the selection of an output folder in which InterCellar will save all downloaded figures and tables in an intuitive folder structure. The lower panel (from supported tools) provides functionalities to upload up to three CCI data generated by InterCellar’s supported input methods. Here, we upload CellChat-predicted CCI data for the melanoma dataset<sup>6</sup> by specifying an ID, an output folder tag, and the file containing predicted CCI. The bottom inset shows the panel “from custom analysis”. Here, a CCI input table is displayed as an example, alongside the description of required and additional columns. Once again, up to three custom CCI data can be uploaded by the user.

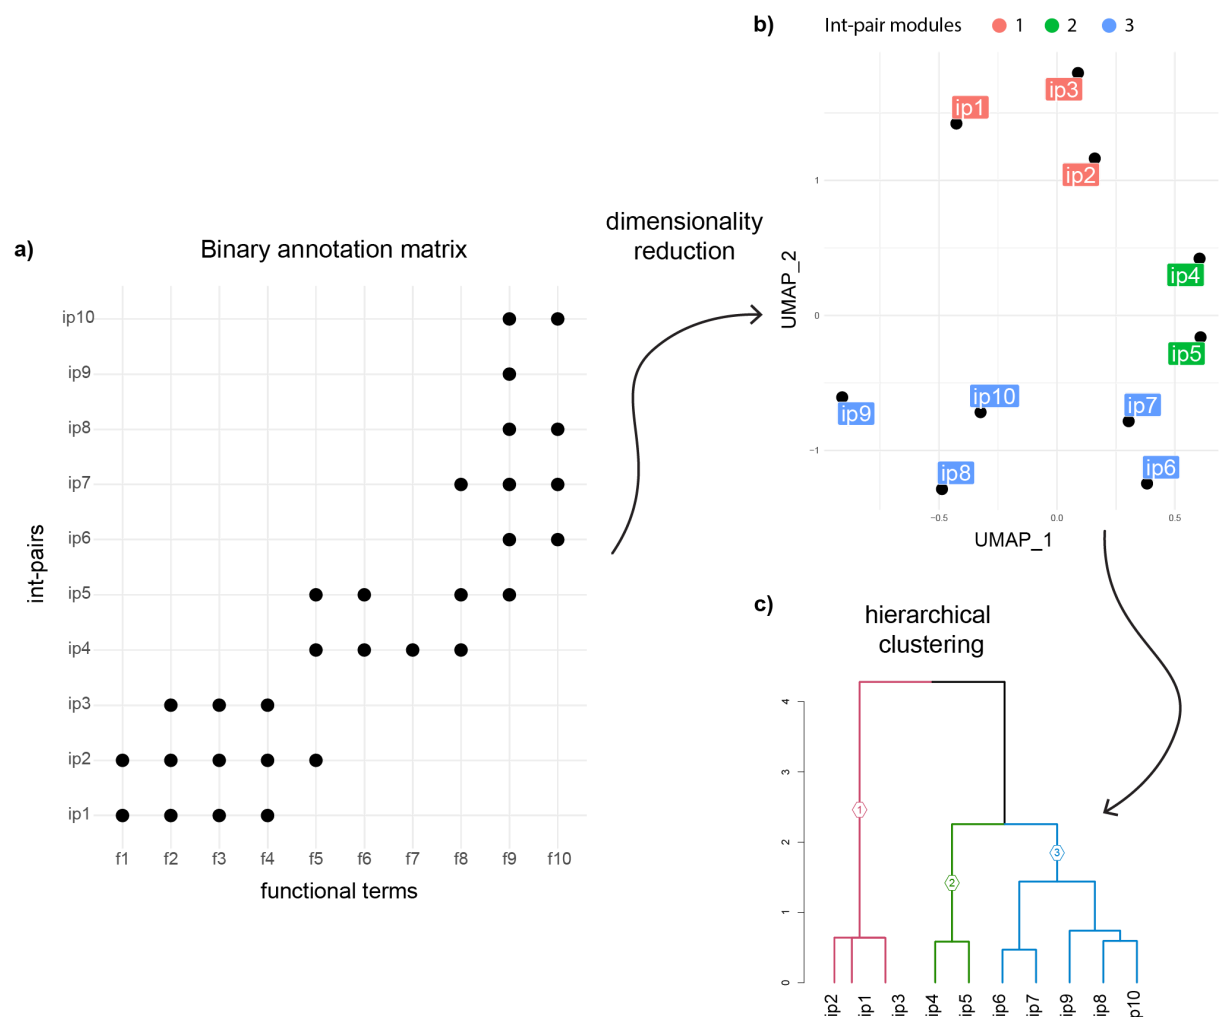

**Supplementary Figure 2. InterCellar’s definition of int-pair modules based on functional similarity.** A representative binary (boolean domain  $\{0,1\}$ ) annotation matrix is shown in **a)**, where black dots indicate “1s” and thus an existing annotation of the functional

term “f-” to an int-pair “ip-”. InterCellar uses this binary matrix as input to a dimensionality reduction method (UMAP in **b**), using cosine similarity as metric to compute distances between data points), which provides a 2-dimensional embedding of int-pairs reflecting the functional similarity. Using the UMAP coordinates, hierarchical clustering is computed to define modules of int-pairs that share similar functional profiles (with euclidean distance and ward.D2 clustering algorithm), as shown in **c**). Colors represent the module identity in both **b**), UMAP and **c**), dendrogram.

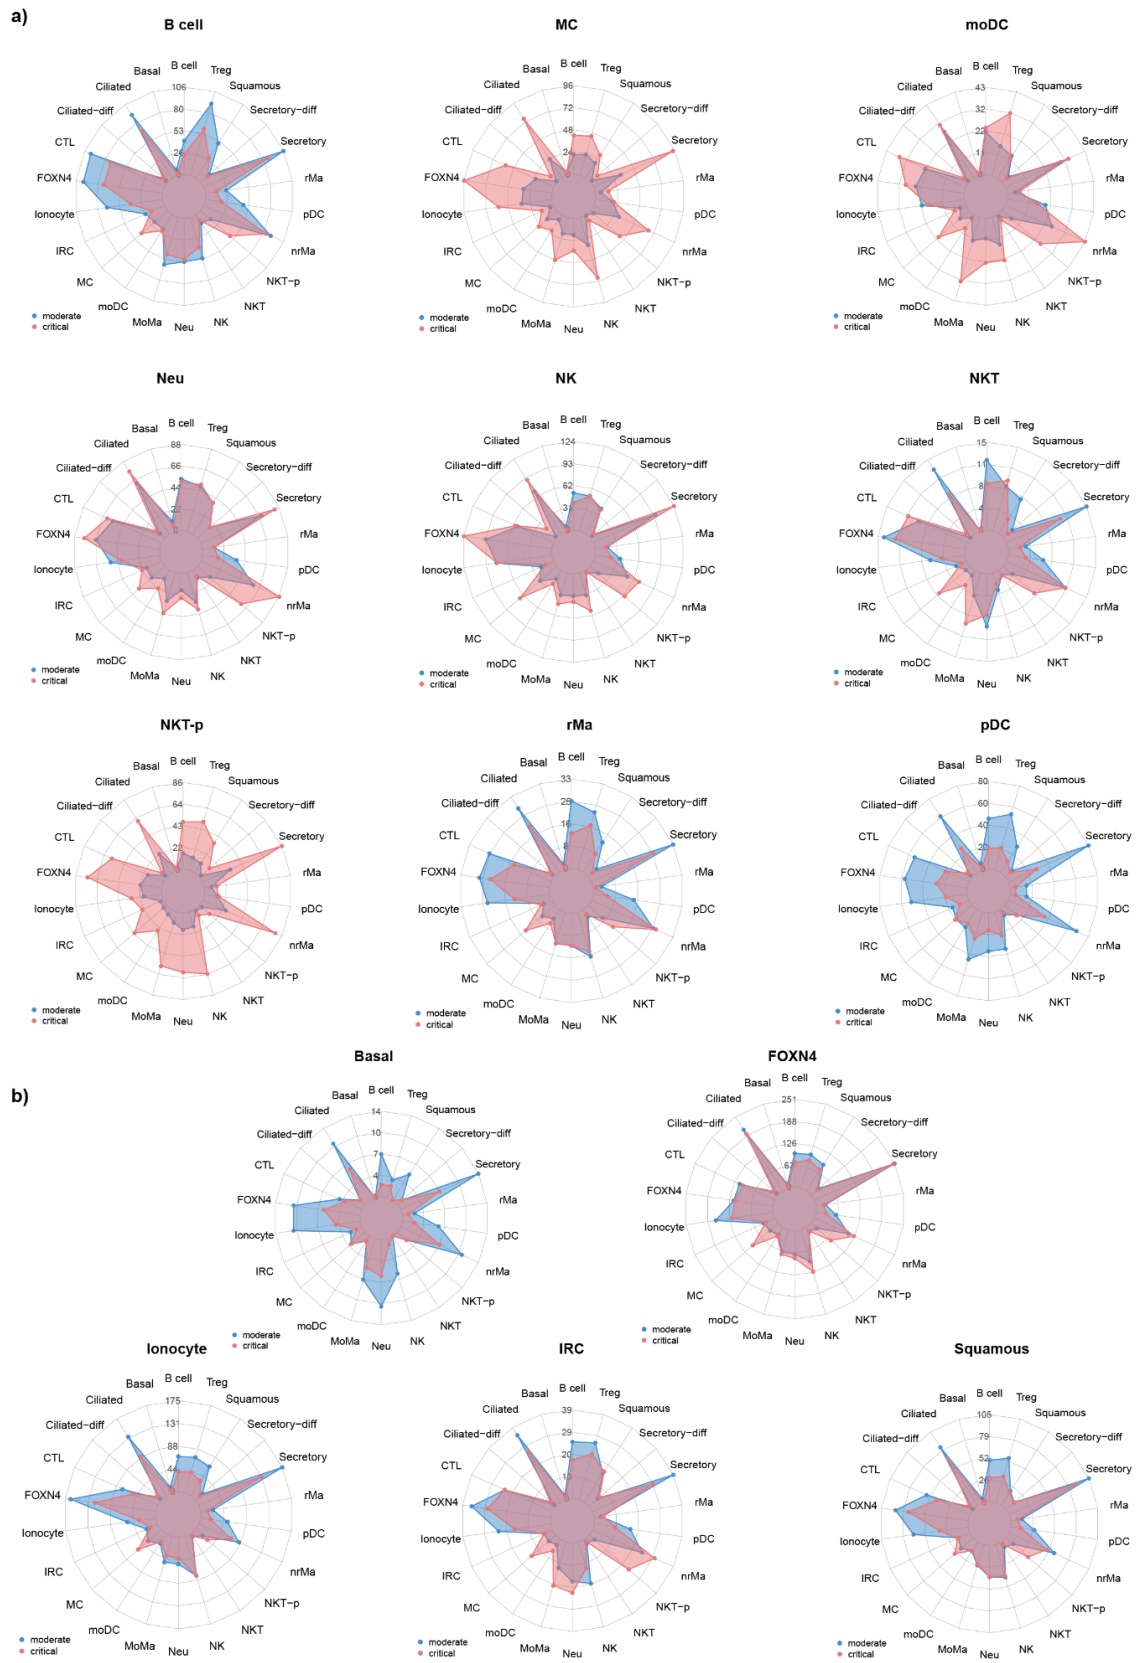

**Supplementary Figure 3. InterCellar generates comprehensive insights on the number of interactions per cell cluster. Relative differences in the number of interactions are**

shown using radar plots, in the comparison between COVID-19 moderate and critical cases<sup>7</sup>. Each plot displays the number of interactions between a specific cell type and all other cell types participating in the communication. All interaction flows are considered. A subset of cell types belonging to the immune group is reported in **a)**, while a subset of epithelial-related cell types is shown in **b)**. Radar plots are generated automatically in InterCellar's multiple conditions section.

Cell types are abbreviated as: -diff - differentiating; CTL - cytotoxic T cell; FOXN4 - FOXN4+ epithelial cells; IRC - IFNG responsive cell; MC - mast cell; moDC - monocyte-derived dendritic cell; MoMa - monocyte-derived macrophage; Neu - neutrophil; NK - natural killer cell; NKT - NK T cell; NKT-p - proliferating NKT; nrMa - non-resident macrophage; pDC - plasmacytoid dendritic cell; rMa - resident macrophage; Treg - regulatory T cell.

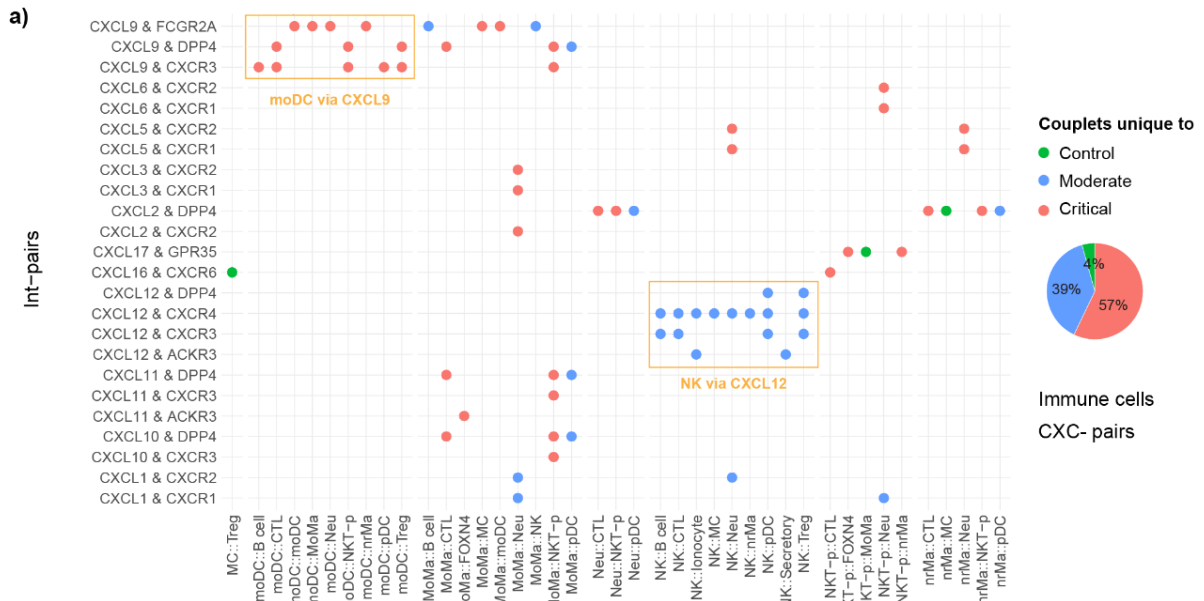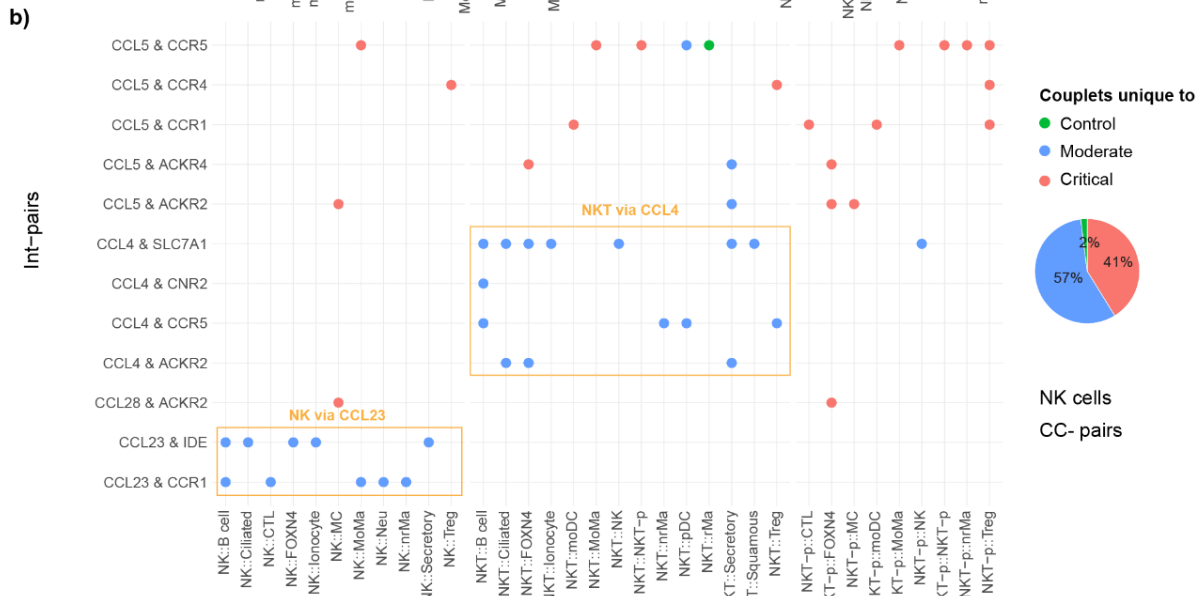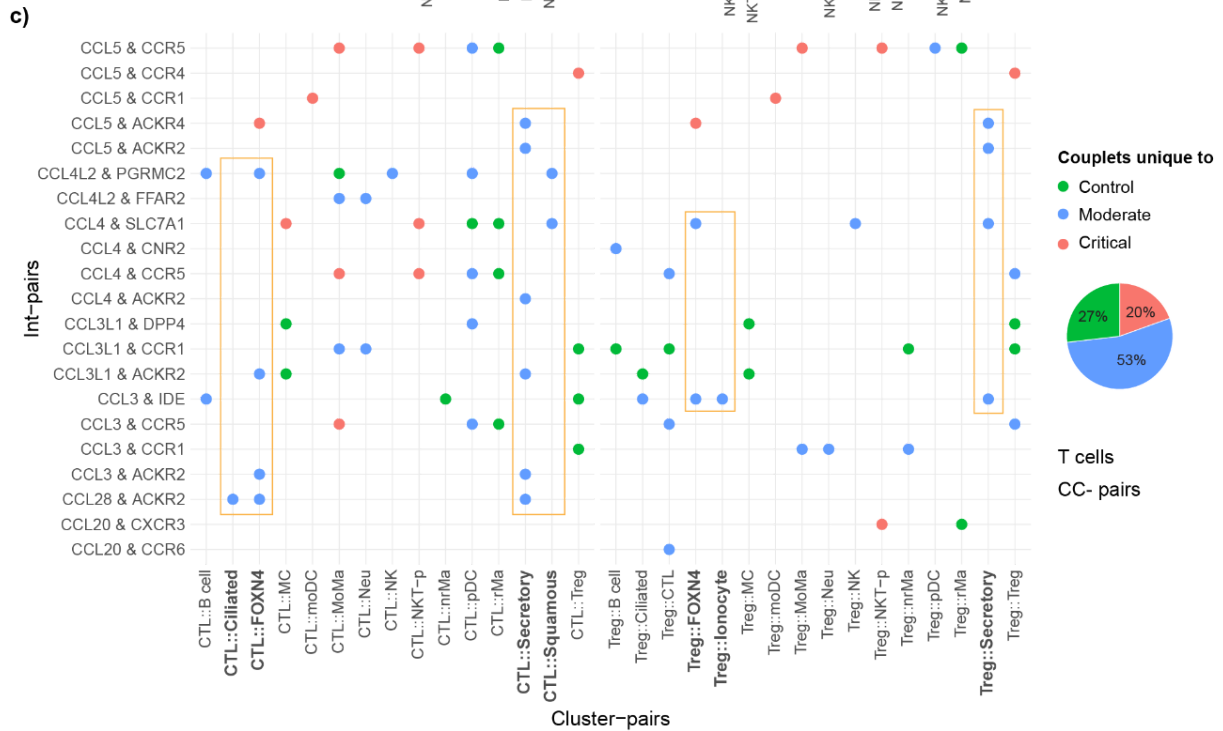

**Supplementary Figure 4. InterCellar allows in-depth analysis of interaction pairs and their enriched cell clusters.** **a)** Int-pairs belonging to the CXC-chemokine subfamily are evaluated in immune cell clusters. The dot plot represents only unique occurrences of int-pair/cluster-pair couplets, for each phenotype (control, moderate, critical). The overall contribution of each phenotype is summarized in a pie chart. **b)** Int-pairs belonging to the CC-chemokine subfamily are evaluated in NK, NKT, and NKT-p cell clusters. As in **a)**, only unique couplets are represented in the dot plot and overall contributions by phenotype are summarized in a pie chart. **c)** As in **b)**, but focusing on T cells (CTL and Tregs). Both dot plots and pie charts are generated in InterCellar’s multiple conditions section.

|                         | InterCellar | CCCEXplorer  | pyMINEr   | CellChat Explorer | Cellinker | talklr    |
|-------------------------|-------------|--------------|-----------|-------------------|-----------|-----------|
| Programming skills      |             |              |           |                   |           |           |
| Interactive analysis    |             |              |           |                   |           |           |
| Local or remote         | local       | local        | local     | remote            | remote    | remote    |
| Data type               | scRNA-seq   | bulk RNA-seq | scRNA-seq | scRNA-seq         | scRNA-seq | scRNA-seq |
| Customization/filtering |             |              |           |                   |           |           |
| Visualization           |             |              |           |                   |           |           |
| Cluster-based           |             |              |           |                   |           |           |
| Gene-based              |             |              |           |                   |           |           |
| Function-based          |             |              |           |                   |           |           |
| Download                |             |              |           |                   |           |           |
| Figures                 |             |              |           |                   |           |           |
| Tables                  |             |              |           |                   |           |           |

**Supplementary Figure 5. Feature comparison between InterCellar and other related tools.** Seven main categories evaluate InterCellar’s functionalities against other open-source software allowing the analysis of cell-cell communication. For this comparison, only tools that do not require programming skills were considered. Visualization options are divided into three sub-categories to account for specific features implemented with regards to cell clusters, genes, and functional pathways. Automatic download of figures and tables is considered separately.





shown in the outer circle, with colored links representing the interactions between two clusters (color-coded).

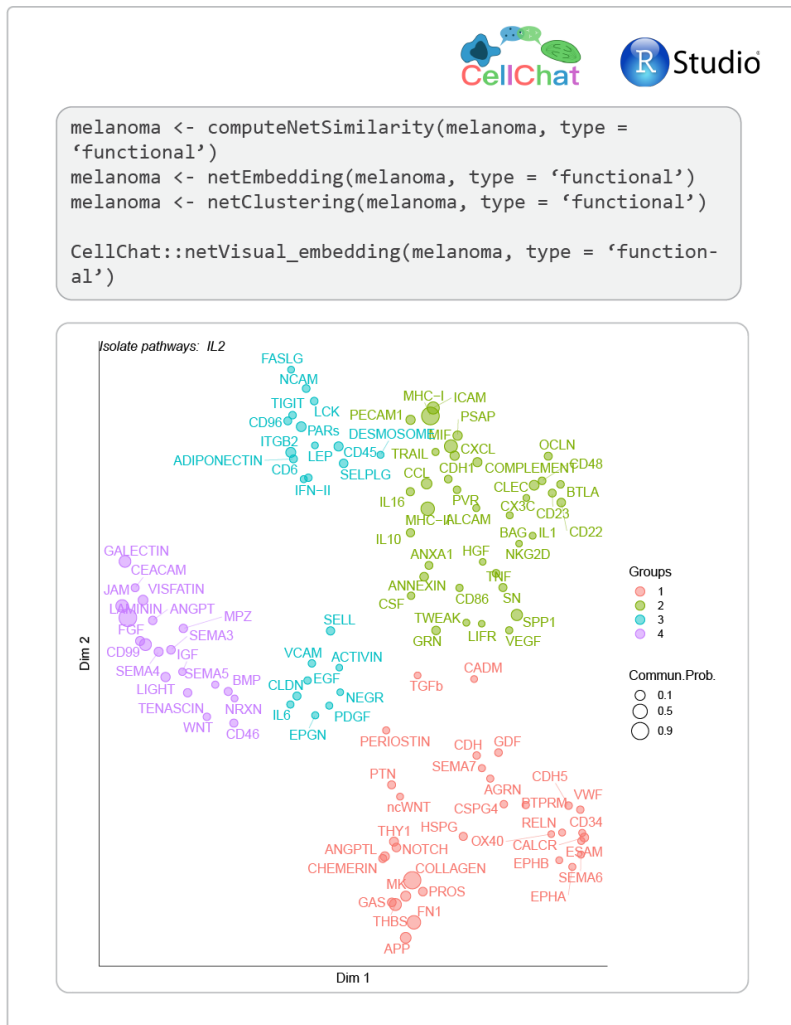

**Supplementary Figure 7. CellChat embedding of pathways based on functional similarity.** UMAP of CellChat-annotated pathways shows the results of the functional similarity analysis, with R code available in the gray panel. Each dot represents a pathway, color-coded by the group identity. Pathways that are found to be functionally similar share a common pattern of sender and receiver clusters and can be interpreted as signaling pathways that exhibit similar and/or redundant roles.

## Supplementary Tables

|  | Implementat<br>ion | Standalone<br>app | App web<br>address | Data type | DOI | Source code |
|--|--------------------|-------------------|--------------------|-----------|-----|-------------|
|--|--------------------|-------------------|--------------------|-----------|-----|-------------|

|                    |                  |                 |                                                                                                             |                    |                                |                                                                                                         |
|--------------------|------------------|-----------------|-------------------------------------------------------------------------------------------------------------|--------------------|--------------------------------|---------------------------------------------------------------------------------------------------------|
| <b>CCCEXplorer</b> | Java             | YES             | N/A                                                                                                         | bulk RNA-seq       | 10.1016/j.celrep.2015.01.040   | <a href="https://github.com/methodistsmab/CCCExplorer">https://github.com/methodistsmab/CCCExplorer</a> |
| <b>CellChat</b>    | R                | YES             | <a href="http://www.cellchat.org/">http://www.cellchat.org/</a>                                             | scRNA-seq          | 10.1038/s41467-021-21246-9     | <a href="https://github.com/sqjin/CellChat">https://github.com/sqjin/CellChat</a>                       |
| <b>Cellinker</b>   | HTML/PHP + MySQL | YES             | <a href="http://www.rna-society.org/cellinker/">http://www.rna-society.org/cellinker/</a>                   | scRNA-seq          | 10.1093/bioinformatics/btab036 | N/A                                                                                                     |
| <b>CellPhonedB</b> | Python           | disabled upload | <a href="https://www.cellphonedb.org/explore-sc-rna-seq">https://www.cellphonedb.org/explore-sc-rna-seq</a> | scRNA-seq          | 10.1038/s41596-020-0292-x      | <a href="https://github.com/Teichlab/cellphonedb">https://github.com/Teichlab/cellphonedb</a>           |
| <b>CellTalker</b>  | R                | NO              | N/A                                                                                                         | scRNA-seq          | 10.1016/j.immuni.2019.11.014   | <a href="https://github.com/arc85/celltalker">https://github.com/arc85/celltalker</a>                   |
| <b>COMUNET</b>     | R                | NO              | N/A                                                                                                         | scRNA-seq          | 10.1093/bioinformatics/btaa482 | <a href="https://github.com/ScialdoneLab/COMUNET">https://github.com/ScialdoneLab/COMUNET</a>           |
| <b>Connectome</b>  | R                | NO              | N/A                                                                                                         | scRNA-seq          | 10.1101/2021.01.21.427529      | <a href="https://github.com/msraredon/Connectome">https://github.com/msraredon/Connectome</a>           |
| <b>CrossTalker</b> | R                | NO              | N/A                                                                                                         | scRNA-seq          | 10.1101/2021.01.20.427390      | <a href="https://github.com/CostaLab/CrossTalker">https://github.com/CostaLab/CrossTalker</a>           |
| <b>ICELLNET</b>    | R                | NO              | N/A                                                                                                         | scRNA-seq          | 10.1101/2020.03.05.976878      | <a href="https://github.com/soumelis-lab/ICELLNET">https://github.com/soumelis-lab/ICELLNET</a>         |
| <b>iTALK</b>       | R                | NO              | N/A                                                                                                         | scRNA-seq          | 10.1101/507871                 | <a href="https://github.com/Coolgenome/iTALK">https://github.com/Coolgenome/iTALK</a>                   |
| <b>NATMI</b>       | Python           | NO              | N/A                                                                                                         | bulk and scRNA-seq | 10.1038/s41467-020-18873-z     | <a href="https://github.com/forrest-lab/NATMI">https://github.com/forrest-lab/NATMI</a>                 |
| <b>NicheNet</b>    | R                | NO              | N/A                                                                                                         | bulk and scRNA-seq | 10.1038/s41592-019-0667-5      | <a href="https://github.com/saeyslab/nichenetr">https://github.com/saeyslab/nichenetr</a>               |
| <b>pyMINER</b>     | Python           | YES             | <a href="https://www.sciencescott.com/pyminer">https://www.sciencescott.com/pyminer</a>                     | scRNA-seq          | 10.1016/j.celrep.2019.01.063   | <a href="https://www.sciencescott.com/pyminer">https://www.sciencescott.com/pyminer</a>                 |

|                          |          |     |                                                                                                 |           |                            |                                                                                                                 |
|--------------------------|----------|-----|-------------------------------------------------------------------------------------------------|-----------|----------------------------|-----------------------------------------------------------------------------------------------------------------|
| <b>scTensor</b>          | R        | NO  | N/A                                                                                             | scRNA-seq | 10.1101/566182             | <a href="https://github.com/rikenbit/scTensor">https://github.com/rikenbit/scTensor</a>                         |
| <b>SingleCellSignalR</b> | R        | NO  | N/A                                                                                             | scRNA-seq | 10.1093/nar/gkaa183        | <a href="https://github.com/SCA-IRCM/SingleCellSignalR_v1">https://github.com/SCA-IRCM/SingleCellSignalR_v1</a> |
| <b>SoptSC</b>            | R/MATLAB | NO  | N/A                                                                                             | scRNA-seq | 10.1093/nar/gkz204         | <a href="https://mkarikom.github.io/RSoptSC/">https://mkarikom.github.io/RSoptSC/</a>                           |
| <b>SpaOTsc</b>           | Python   | NO  | N/A                                                                                             | scRNA-seq | 10.1038/s41467-020-15968-5 | <a href="https://github.com/zcang/SpaOTsc">https://github.com/zcang/SpaOTsc</a>                                 |
| <b>talklr</b>            | R        | YES | <a href="https://yuliangwang.shinyapps.io/talklr/">https://yuliangwang.shinyapps.io/talklr/</a> | scRNA-seq | 10.1101/2020.02.01.930602  | <a href="https://github.com/yuliangwang/talklr">https://github.com/yuliangwang/talklr</a>                       |

**Supplementary Table 1. Collection of methods to predict and analyze cell-cell communication.** The table contains 18 methods retrieved as of April 2021. All methods concern cell-cell communication prediction and/or analysis. The following information was collected: (a) programming language used for implementation; (b) whether the method is available as a standalone application (thus, not requiring programming skills to conduct the analysis); (c) corresponding web address of the application; (d) data type required for the prediction of cell-cell interactions; (e) DOI of the corresponding manuscript; and (f) web address of the source code. Five methods that do not require programming skills (shown with colored background) were compared to InterCellar.

| source | target | ligand | receptor  | prob        | pval | interaction_name    | interaction_name_2       | pathway_name | annotation         | evidence       |
|--------|--------|--------|-----------|-------------|------|---------------------|--------------------------|--------------|--------------------|----------------|
| Macro  | CAF    | TGFB1  | TGFbR1_R2 | 0.000210484 | 0    | TGFB1_TGFBR1_TGFBR2 | TGFB1 - (TGFBR1+TGFB R2) | TGFb         | Secreted Signaling | KEGG: hsa04350 |

|       |                        |           |                   |                     |   |                                     |                                            |      |                               |                           |
|-------|------------------------|-----------|-------------------|---------------------|---|-------------------------------------|--------------------------------------------|------|-------------------------------|---------------------------|
| Macro | Macro                  | TGFB<br>1 | TGFb<br>R1_R<br>2 | 0.000<br>69448<br>3 | 0 | TGFB<br>1_TG<br>FBR1<br>_TGF<br>BR2 | TGFB<br>1 -<br>(TGF<br>BR1+<br>TGFB<br>R2) | TGFb | Secre<br>ted<br>Signal<br>ing | KEG<br>G:<br>hsa04<br>350 |
| Macro | malign<br>ant_<br>cell | TGFB<br>1 | TGFb<br>R1_R<br>2 | 0.000<br>51357<br>6 | 0 | TGFB<br>1_TG<br>FBR1<br>_TGF<br>BR2 | TGFB<br>1 -<br>(TGF<br>BR1+<br>TGFB<br>R2) | TGFb | Secre<br>ted<br>Signal<br>ing | KEG<br>G:<br>hsa04<br>350 |
| CAF   | CAF                    | TGFB<br>3 | TGFb<br>R1_R<br>2 | 0.000<br>93475<br>3 | 0 | TGFB<br>3_TG<br>FBR1<br>_TGF<br>BR2 | TGFB<br>3 -<br>(TGF<br>BR1+<br>TGFB<br>R2) | TGFb | Secre<br>ted<br>Signal<br>ing | KEG<br>G:<br>hsa04<br>350 |
| CAF   | Macro                  | TGFB<br>3 | TGFb<br>R1_R<br>2 | 0.003<br>09358<br>1 | 0 | TGFB<br>3_TG<br>FBR1<br>_TGF<br>BR2 | TGFB<br>3 -<br>(TGF<br>BR1+<br>TGFB<br>R2) | TGFb | Secre<br>ted<br>Signal<br>ing | KEG<br>G:<br>hsa04<br>350 |

**Supplementary Table 2. Example of CellChat CCI data as input to InterCellar.** Example of CCI data as generated by CellChat, automatically parsed by InterCellar as input data.

| id_cp_i<br>n<br>t<br>e<br>r<br>a<br>c<br>t<br>i<br>o<br>n | interac<br>ting_p<br>air             | partner<br>_a         | partner<br>_b                        | gene_a      | gene_<br>b | secret<br>ed | recept<br>or_a | recept<br>or_b | ... |
|-----------------------------------------------------------|--------------------------------------|-----------------------|--------------------------------------|-------------|------------|--------------|----------------|----------------|-----|
| CPI-SC<br>05F111<br>D21                                   | COL27<br>A1_a11<br>b1<br>comple<br>x | simple:<br>Q8IZC<br>6 | comple<br>x:a11b<br>1<br>comple<br>x | COL27<br>A1 |            | TRUE         | FALSE          | FALSE          | ... |
| CPI-SS<br>016EE<br>0084                                   | PDCD1<br>_CD27<br>4                  | simple:<br>Q1511<br>6 | simple:<br>Q9NZQ<br>7                | PDCD1       | CD274      | FALSE        | TRUE           | TRUE           | ... |
| CPI-SS                                                    | KIR2D                                | simple:               | simple:                              | KIR2D       | CXCL9      | TRUE         | TRUE           | FALSE          | ... |

|                 |                             |                                |               |                      |                   |                    |                     |                  |     |
|-----------------|-----------------------------|--------------------------------|---------------|----------------------|-------------------|--------------------|---------------------|------------------|-----|
| 0D26F639E       | L3_CXCL9                    | P43628                         | Q07325        | L3                   |                   |                    |                     |                  |     |
| CPI-CS0AC5142FA | IL1 receptor inhibitor_IL1A | complex:IL1 receptor inhibitor | simple:P01583 |                      | IL1A              | TRUE               | TRUE                | FALSE            | ... |
| ...             | ...                         | ...                            | ...           | ...                  | ...               | ...                | ...                 | ...              | ... |
| ...             | <b>annotation_strategy</b>  | <b>is_integrin</b>             | <b>rank</b>   | <b>B_cell B_cell</b> | <b>B_cell CAF</b> | <b>B_cell Endo</b> | <b>B_cell Macro</b> | <b>B_cell NK</b> | ... |
| ...             | curated                     | TRUE                           | 0.02          |                      |                   |                    |                     | 0.034            | ... |
| ...             | curated                     | FALSE                          | 0.02          |                      | 0.816             |                    |                     |                  | ... |
| ...             | IMEx,IntAct                 | FALSE                          | 0.02          |                      |                   |                    |                     |                  | ... |
| ...             | curated                     | FALSE                          | 0.02          |                      |                   |                    | 1.055               |                  | ... |

**Supplementary Table 3. Example of CellPhoneDB v2 “significant\_means” table as input to InterCellar.** Four example rows are taken from the significant\_means.txt file saved by CPDB statistical analysis. The table is split after the ninth column for easier interpretation. Not all columns are shown, as they are comprised of all possible cluster-pairs in the dataset.

|                             | <b>CAF</b>  | <b>Macro</b> | <b>T_cell</b> | <b>B_cell</b> | <b>Endo</b> | <b>NK</b>   |
|-----------------------------|-------------|--------------|---------------|---------------|-------------|-------------|
| <b>AMH / BMPR1A + AMHR2</b> | 0           | 0            | 1.179866138   | 0.637237869   | 0           | 0           |
| <b>AMH / ACVR1 + AMHR2</b>  | 0           | 3.85242671   | 1.217964923   | 0.451851926   | 0           | 0           |
| <b>AREG / EGFR</b>          | 2.374966797 | 0.00930926   | 0.017255723   | 0.042389732   | 0.171259444 | 0.163602413 |
| <b>BMP10 /</b>              | 3.7620708   | 2.1915530    | 0.9590051     | 0.6822325     | 5.4375626   | 1.0956195   |

|                                            |                 |           |                 |                 |                 |    |
|--------------------------------------------|-----------------|-----------|-----------------|-----------------|-----------------|----|
| <b>ACVRL1<br/>+<br/>ACVR2A</b>             | 48              | 94        | 28              |                 | 33              | 23 |
| <b>BMP10 /<br/>ACVRL1<br/>+<br/>ACVR2B</b> | 1.9240095<br>52 | 1.2200742 | 0.9223253<br>68 | 0.9033256<br>95 | 4.4625826<br>79 | 0  |

**Supplementary Table 4. Example of ICELLNET CCI data as input to InterCellar.**

Example of CCI data as generated by ICELLNET, when considering malignant cells as central cell and outgoing communication. Row names represent the interaction pairs while column names represent the cell clusters considered in the analysis, communicating with malignant cells.

| <b>CAF</b>    | <b>malignant_cell</b> | <b>interaction.type</b> | <b>LRscore</b>    |
|---------------|-----------------------|-------------------------|-------------------|
| <i>TIMP1</i>  | <i>CD63</i>           | autocrine paracrine     | 0.943270962296891 |
| <i>VIM</i>    | <i>CD44</i>           | autocrine paracrine     | 0.930737459594635 |
| <i>COL1A2</i> | <i>CD44</i>           | autocrine paracrine     | 0.928081880647428 |

**Supplementary Table 5. Example of SingleCellSignalR text file as input to InterCellar.**

SingleCellSignalR generates a text file for each cluster-pair and interaction type (autocrine/paracrine) considered and saves it in the “cell-signaling” folder, which is expected as input to InterCellar. Here, the interactions between CAF and malignant cells are computed.

## Supplementary References

1. Jin, S. *et al.* Inference and analysis of cell-cell communication using CellChat. *Nat. Commun.* **12**, 1088 (2021).
2. Efremova, M., Vento-Tormo, M., Teichmann, S. A. & Vento-Tormo, R. CellPhoneDB: inferring cell–cell communication from combined expression of multi-subunit

- ligand–receptor complexes. *Nat. Protoc.* **15**, 1484–1506 (2020).
3. Cabello-Aguilar, S. *et al.* SingleCellSignalR: inference of intercellular networks from single-cell transcriptomics. *Nucleic Acids Res.* **48**, e55 (2020).
  4. Noël, F. *et al.* Dissection of intercellular communication using the transcriptome-based framework ICELLNET. *Nat. Commun.* **12**, 1089 (2021).
  5. Armingol, E., Officer, A., Harismendy, O. & Lewis, N. E. Deciphering cell–cell interactions and communication from gene expression. *Nat. Rev. Genet.* **22**, 71–88 (2020).
  6. Tirosh, I. *et al.* Dissecting the multicellular ecosystem of metastatic melanoma by single-cell RNA-seq. *Science* **352**, 189–196 (2016).
  7. Chua, R. L. *et al.* COVID-19 severity correlates with airway epithelium-immune cell interactions identified by single-cell analysis. *Nat. Biotechnol.* **38**, 970–979 (2020).
