# Supplementary material for: InterCellar enables interactive analysis and exploration of cell−cell communication in single-cell transcriptomic data
Source: PubMed Central journal article supplement (PMC8752611; doi:10.1038/s42003-021-02986-2), 2022-01-11
Supplement: 42003_2021_2986_MOESM3_ESM.pdf [file 42003_2021_2986_MOESM3_ESM.pdf]

## Description of Additional Supplementary Files

**File name:** Supplementary Data 1

**Description:** The tables contain total number of interactions per cluster in the COVID-19 critical and moderate cases, used to generate Figure 4a. Paracrine and autocrine interactions are split in two columns.
